# Supplementary material
Source: PubMed Central journal article supplement (PMC2633052)

**Supplemental Figure 1. *Meis1* is essential for alignment of the cardiac outflow tract.**

**(A, B)** Gross appearance of E14.5 wildtype (A) and *Meis1*<sup>-/-</sup> (B) embryos.

**(C, D)** Hematoxylin & eosin (H&E) stained sections of the aorta and main pulmonary artery of wildtype (C) and *Meis1*<sup>-/-</sup> (D) embryos at E14.5 shows normal aorticopulmonary septation. Ao: aorta. MPA: main pulmonary artery. RV: right ventricle.

**(E, F)** Histology of the ventricles of wildtype (E) and *Meis1*<sup>-/-</sup> (F) embryos at E14.5 shows a large ventricular septal defect (VSD) in *Meis1*<sup>-/-</sup> embryos. LV: left ventricle.

*Meis1* Null Embryos Have a Large Ventricular Septal Defect

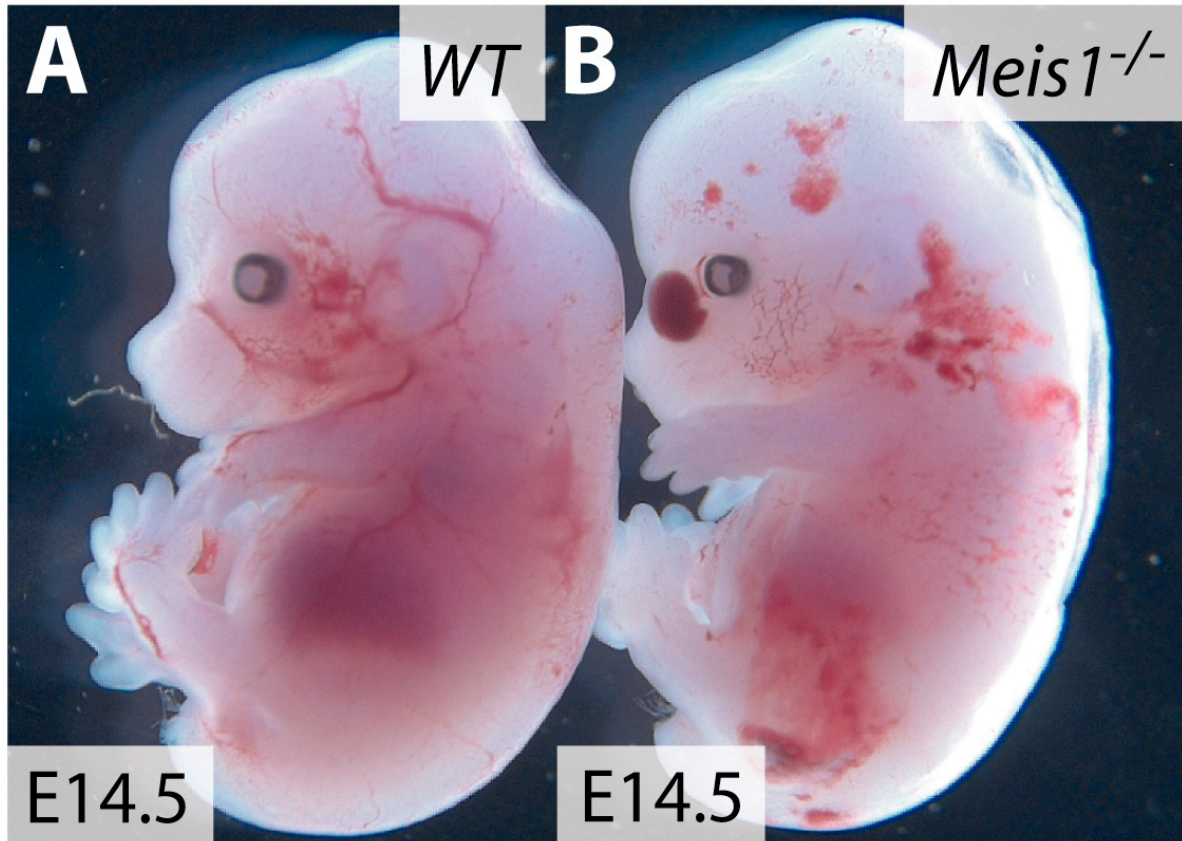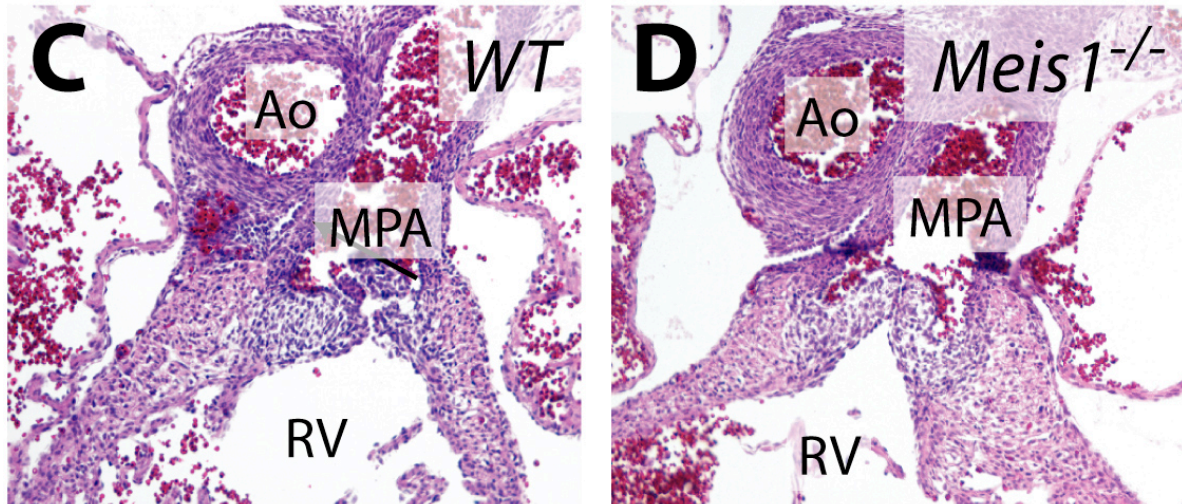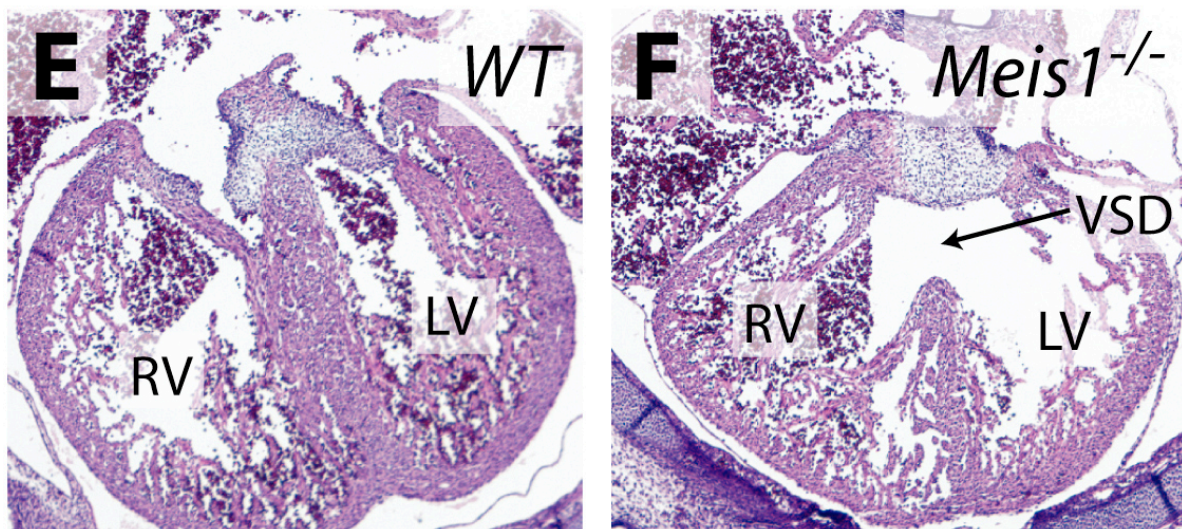

Supplement: NIHMS88431-supplement-Suppl_Data.pdf [file NIHMS88431-supplement-Suppl_Data.pdf]
